# Supplementary material for: Facile Microwave Assisted Synthesis of Silver Nanostars for Ultrasensitive Detection of Biological Analytes by SERS
Source: MDPI journal article supplement (doi:10.3390/ijms23158830), 2022-08-08
Supplement: s1 [file s1]

# Facile Microwave Assisted Synthesis of Silver Nanostars for Ultrasensitive Detection of Biological Analytes by SERS

Radu Nicolae Revnic <sup>1</sup>, Gabriela Fabiola Știuțiuc <sup>2,3,\*</sup>, Valentin Toma <sup>3</sup>, Anca Onaciu <sup>3,4</sup>, Alin Moldovan <sup>3</sup>, Adrian Bogdan Țigu <sup>5</sup>, Eva Fischer-Fodor <sup>6</sup>, Romulus Tetean <sup>2</sup>, Emil Burzo <sup>2</sup> and Rareș Ionuț Știuțiuc <sup>3,4,\*</sup>

<sup>1</sup> Department of Family Medicine, “Iuliu Hatieganu” University of Medicine and Pharmacy, 2-4 Clinicilor Street, 400006 Cluj-Napoca, Romania

<sup>2</sup> Faculty of Physics, “Babes-Bolyai” University, 1 Kogalniceanu Street, 400084 Cluj-Napoca, Romania

<sup>3</sup> Department of BioNanoPhysics, MedFuture Research Center for Advanced Medicine, “Iuliu Hatieganu” University of Medicine and Pharmacy, 4-6 Pasteur Street, 400337 Cluj-Napoca, Romania

<sup>4</sup> Department of Pharmaceutical Physics & Biophysics, Faculty of Pharmacy, “Iuliu Hatieganu” University of Medicine and Pharmacy, 6 Pasteur Street, 400349 Cluj-Napoca, Romania

<sup>5</sup> Department of Translational Medicine, MedFuture Research Center for Advanced Medicine, “Iuliu Hatieganu” University of Medicine and Pharmacy, 4-6 Pasteur Street, 400337 Cluj-Napoca, Romania

<sup>6</sup> Oncology Institute “Prof. Dr. Ion Chiricuta”, 400015 Cluj-Napoca, Romania

\* Correspondence: gabriela.stiuftiuc@ubbcluj.ro (G.F.Ș.); rares.stiuftiuc@umfcluj.ro (R.I.Ș.); Tel.: +40-726-340-278 (R.I.Ș.)

## S1. EDS Analysis

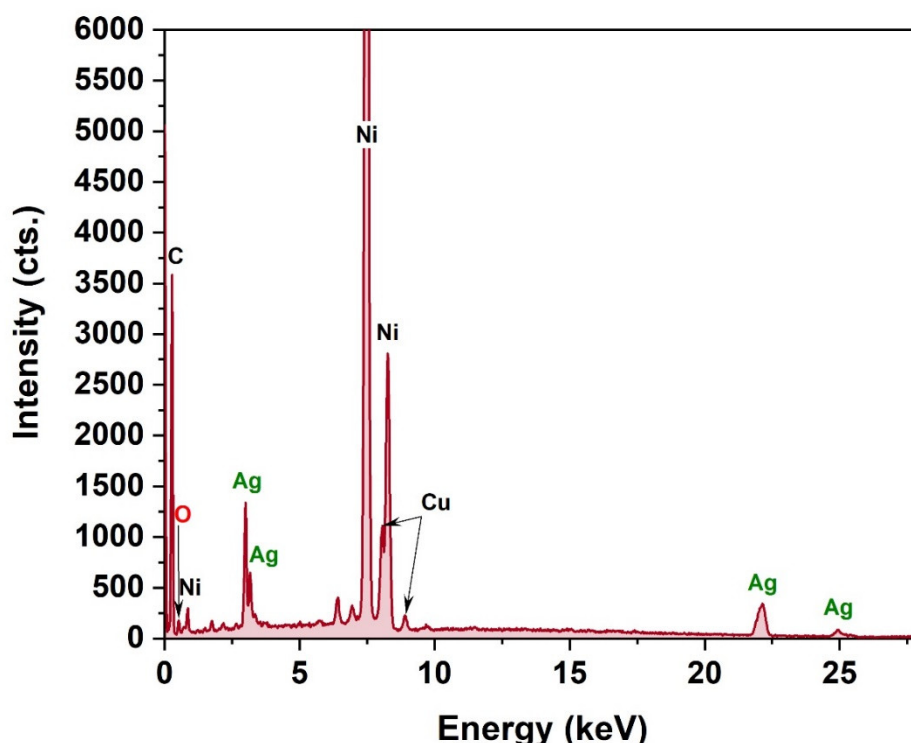

Figure S1. EDS analysis of purified silver colloids.

## S2. Calculation of the EF

Rhodamine 6G (R6G) molecules have been employed as standard analytes for EF calculation. As such, we have recorded Raman and SERS spectra of R6G solution (1mM) under the same experimental conditions (Figure S1). The calculations have been performed according to the procedure developed by Gupta and Weimar [1], using the following equation:

$$EF = \frac{M_{Raman} \times S_{Surf} \times I_{Surf}}{M_{Surf} \times S_{Raman} \times I_{Raman}}$$

where  $M_{Surf}$  and  $M_{Raman}$  are the numbers of molecules,  $S_{Surface}$  and  $S_{Raman}$  are the geometrical areas of the molecular films and  $I_{Surf}$  and  $I_{Raman}$  are the SERS/Raman intensities of the most intense vibrational band that has been used for the calculation of EF (1510  $\text{cm}^{-1}$ ). Both measurements were performed using a 50 $\times$  objective and an excitation laser of 785 nm. In the case of Raman measurements, a 100% laser power was used, the acquisition time was 10 s and the number of spectral acquisitions was 4. In the case of SERS measurement, the only modification that has been made was the laser power which was set to 0.1%. The laser intensity, measured on sample surface, was 113 mW (100 % laser power) respectively 0.22 mW (0.1% laser power). The intensities of all vibrational bands included in this study were plotted in kcounts/(mW  $\times$  s) units. In the case of Raman/SERS measurements employed for EF calculation 1mM aqueous solutions of R6G have been used. The diameter of the circular spot was  $\sim$ 2 mm in both cases. The Raman/SERS values of 1510  $\text{cm}^{-1}$  band intensities were 43.3 respectively 0.0054 kcounts/(mW  $\times$  s).

Using these data, the EF has a value of  $\sim 8 \times 10^3$ .

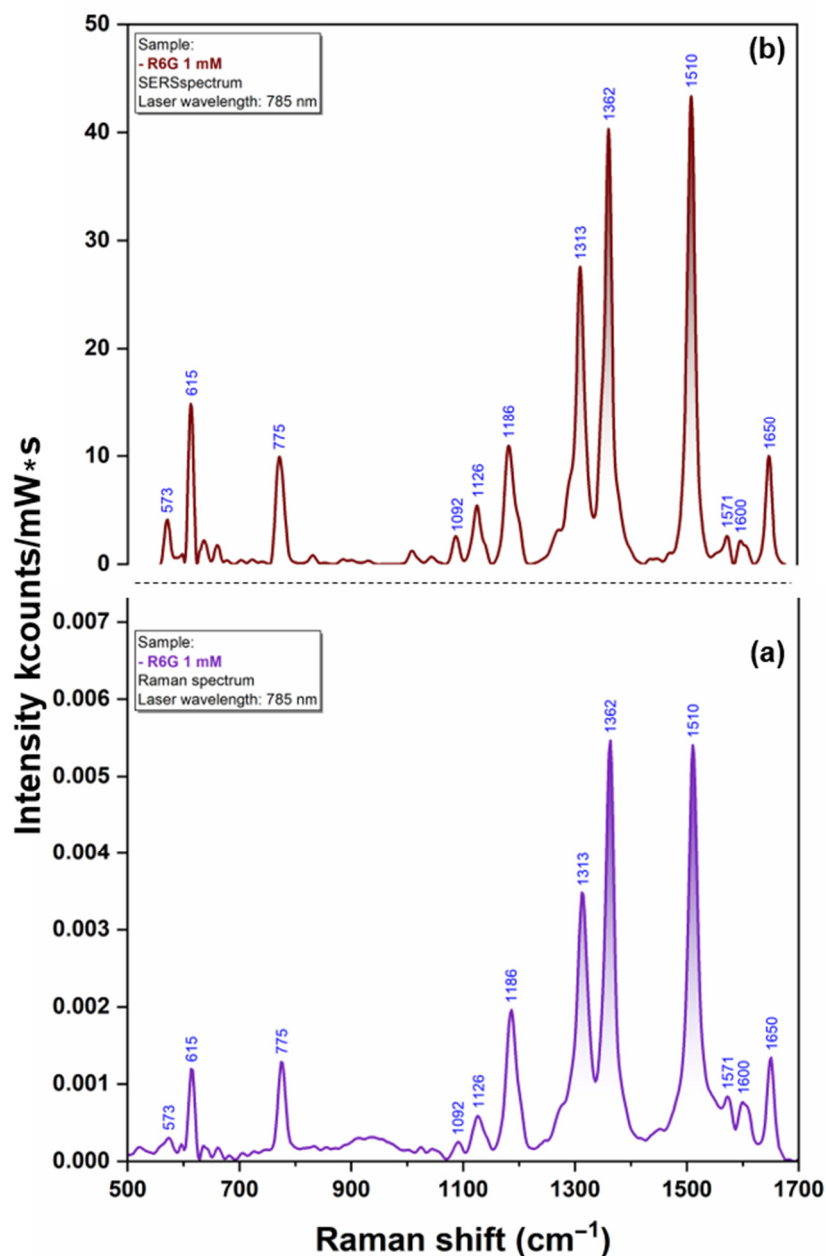

**Figure S2.** Raman (a) and SERS (b) spectra of R6G solutions ( $10^{-3}$  M) employed for EF calculation. The spectra were recorded using a 785 nm excitation laser.

**Table S1.** Tentative assignments of major vibrational bands in methylene blue, doxorubicin, atenolol, metoprolol, DLD1 cell lysates, cysteine, and methionine samples.

| Methylene Blue                 |                                                                                         |            |
|--------------------------------|-----------------------------------------------------------------------------------------|------------|
| Wavenumber (cm <sup>-1</sup> ) | Vibration mode                                                                          | References |
| 451                            | In plane ring deformation (C – N – C) <sub>AMG</sub> ; Skeletal deformation (C – N – C) | [2–4]      |
| 504                            | In plane ring deformation (C – N – C) <sub>AMG</sub> ; Skeletal deformation (C – N – C) | [2–4]      |
| 599                            | In plane ring deformation (C – N – C) <sub>AMG</sub>                                    | [2,3]      |

|                    |                                                                                                                                 |         |
|--------------------|---------------------------------------------------------------------------------------------------------------------------------|---------|
| 615                | Out of plane bend (C – H) <sub>Ring</sub>                                                                                       | [2]     |
| 677                | Out of plane bend (C – H) <sub>Ring</sub>                                                                                       | [2,4]   |
| 773                | Str (C – N) <sub>AMG</sub> ; In plane ring deformation (C – N – C) <sub>Ring</sub>                                              | [2,3]   |
| 831                | Out of plane bend (C – H) <sub>Ring</sub>                                                                                       | [2]     |
| 886                | In plane ring deformation (C – C – C) <sub>Ring</sub>                                                                           | [2]     |
| 953                | Rock (CH <sub>2</sub> ); In plane bend (CH)                                                                                     | [2,3]   |
| 1041               | In plane bend (CH); Str (C – S)                                                                                                 | [2,3]   |
| 1152               | In plane bend (CH)                                                                                                              | [2]     |
| 1178               | Rock (CH <sub>3</sub> ); In plane bend (CH); Str (C – N)                                                                        | [2,3,5] |
| 1219               | Rock (CH <sub>3</sub> ); In plane bend (CH)                                                                                     | [2]     |
| 1302               | In plane bend (CH); Str (C – N) <sub>Ring</sub>                                                                                 | [2,3]   |
| 1324               | Str (C – N) <sub>Ring</sub> ; Str (C – N) <sub>AMG</sub> ; In plane bend (CH)                                                   | [2]     |
| 1395               | Str (C <sub>9</sub> – N <sub>10</sub> ); Str (C <sub>3</sub> – N <sub>2</sub> )                                                 | [2,3]   |
| 1433               | In plane ring deformation (N – C – H) <sub>AMG</sub>                                                                            | [2]     |
| 1503               | Twist (CH <sub>2</sub> ); In plane bend (CH)                                                                                    | [2]     |
| <b>Doxorubicin</b> |                                                                                                                                 |         |
| 347                | In plane deformation (C – C – O)                                                                                                | [6]     |
| 448                | In plane deformation (C = O); skeletal deformation                                                                              | [6–8]   |
| 506                | Skeletal deformation                                                                                                            | [8]     |
| 917                | Skeletal deformation                                                                                                            | [8]     |
| 990                | Str (C – C); Ring breath                                                                                                        | [7,8]   |
| 1211               | In plane bend: (O – H) , (C – O), (C – H), (C – O – H) ; Ring stretch symmetry                                                  | [7–9]   |
| 1241               | In plane bend (O – H); Ring stretch symmetry                                                                                    | [8]     |
| 1408               | Skeletal ring stretching                                                                                                        | [6–8]   |
| 1437               | Bend (CC – O – CH); Ring stretch                                                                                                | [8]     |
| 1456               | Stretching at quinine ring; skeletal ring stretching; (C – O – H) vibrations; In plane bend (CC – O)                            | [8–10]  |
| 1573               | Ring stretching; Str (C = C)                                                                                                    | [6–9]   |
| 1639               | Hydrogen-bonded Str (C = O) <sub>Ring</sub> ; Hydrogen-bonded to OH group                                                       | [6,8,9] |
| <b>Atenolol</b>    |                                                                                                                                 |         |
| 640                | In plane bend (C – C – C) <sub>Ring</sub> ; Twist (N <sub>5</sub> H <sub>2</sub> ); In plane ring deformation                   | [11,12] |
| 722                | Wag (C – C – C) <sub>Ring</sub> ; Rock (N <sub>5</sub> H <sub>2</sub> )                                                         | [11]    |
| 824                | Rock (N <sub>5</sub> H <sub>2</sub> ); In plane bend (C – C – C) <sub>Ring</sub> ; Out of plane bend (C – H) <sub>Ring</sub>    | [11,12] |
| 859                | Str (C <sub>7</sub> C <sub>9</sub> ); Ring breathing                                                                            | [11,12] |
| 893                | Str (C <sub>7</sub> C <sub>9</sub> ); Ring breathing                                                                            | [11]    |
| 950                | Rock (C <sub>18</sub> H <sub>38</sub> ); Wag (C <sub>19</sub> O <sub>3</sub> N <sub>5</sub> ); In plane bend (CH <sub>3</sub> ) | [11,12] |
| 1015               | In plane bend (CH) <sub>Ring</sub> ; In plane ring deformation                                                                  | [12]    |
| 1045               | Rock (N <sub>5</sub> H <sub>2</sub> )                                                                                           | [11]    |
| 1160               | In plane bend (CH) <sub>Ring</sub> ; Twist (C <sub>18</sub> H <sub>2</sub> ); In plane bend asymmetry (CH <sub>2</sub> )        | [11,12] |
| 1230               | Str (O <sub>1</sub> C <sub>12</sub> ); In plane bend (C – C – C) <sub>Ring</sub>                                                | [11]    |

|                           |                                                                                                              |         |
|---------------------------|--------------------------------------------------------------------------------------------------------------|---------|
| 1240                      | In plane bend ( $O_{10}H_2$ ), ( $C_{11}H_2$ ), ( $N_{12}H_2$ )                                              | [12]    |
| 1298                      | In plane bend ( $C_{19}N_5H_{40}$ ); Wag ( $C_{18}H_{12}$ ); In plane bend ( $CH_2$ )                        | [11,12] |
| 1401                      | In plane bend: ( $CH_3$ ), ( $C_{11}H_2$ ), ( $C_8H_2$ )                                                     | [12]    |
| 1453                      | In plane bend: ( $C_{11}H_3$ ), ( $C_9H_2$ ), ( $CH_3$ )                                                     | [11,12] |
| 1610                      | Str ( $C - C$ ) <sub>Ring</sub> ; In plane bend ( $C - H$ ) <sub>Ring</sub> ( $NH_2$ )                       | [11]    |
| <b>Metoprolol</b>         |                                                                                                              |         |
| 639                       | In plane bend ( $C - C - C$ ) <sub>Ring</sub> ; In plane ring deformation                                    | [11,12] |
| 662                       | In plane ring deformation                                                                                    | [12]    |
| 722                       | In plane bend: ( $NH$ ), ( $CH$ ), ( $CH_2$ ), ( $CH_3$ )                                                    | [12]    |
| 754                       | In plane bend: ( $N_4H_{24}$ ), ( $C - C$ ) <sub>Ring</sub>                                                  | [11]    |
| 827                       | Rock ( $C_5H_2$ ), ( $O_3H_{18}C_{19}$ )                                                                     | [11]    |
| 852                       | Ring breathing; In plane bend ( $N_4H_{24}$ )                                                                | [11,12] |
| 920                       | In plane bend ( $CH_2$ ), ( $CH_3$ )                                                                         | [12]    |
| 949                       | Rock ( $C_{11}H_2$ ); In plane bend ( $C_{10}H_3$ )                                                          | [11]    |
| 1000                      | Str ( $C_8HC_9H$ ); In plane bend: ( $CH_2$ ), ( $CH_3$ )                                                    | [12]    |
| 1044                      | Str ( $O_1C_8$ )                                                                                             | [11]    |
| 1135                      | Rock: ( $CH_2$ ), ( $CH_3$ ), ( $NH_2$ )                                                                     | [12]    |
| 1180                      | In plane bend: ( $C_{13}H_{34}$ ), ( $O_2H_{35}$ ); Rock: ( $CH_2$ ), ( $CH_3$ )                             | [11,12] |
| 1206                      | In plane bend: ( $O_2H_{35}$ ), ( $C_{13}H_{34}$ )                                                           | [11]    |
| 1240                      | Rock ( $CH_2$ )                                                                                              | [12]    |
| 1300                      | In plane bend: ( $C_5H_{20}$ ), ( $OH$ ), ( $NH$ ), ( $CH_2$ ); Wag ( $C_6H_2$ )                             | [11,12] |
| 1341                      | In plane bend ( $OH$ ); Twist ( $NH_2$ ); Wag ( $CH_2$ )                                                     | [12]    |
| 1447                      | In plane bend: ( $C_9H_3$ ), ( $C_{10}H_3$ )                                                                 | [11]    |
| 1584                      | Str ( $C - C$ ) <sub>Ring</sub> ; In plane bend ( $C - H$ ) <sub>Ring</sub>                                  | [11,12] |
| 1610                      | Str ( $C - C$ ) <sub>Ring</sub> ; In plane bend ( $C - H$ ) <sub>Ring</sub>                                  | [12]    |
| <b>DLD-1 cells lysate</b> |                                                                                                              |         |
| 627                       | Proteins, phenylalanine                                                                                      | [13]    |
| 656                       | Proteins, tyrosine                                                                                           | [14]    |
| 725                       | Bend ( $N - H$ ); Adenine; DNA                                                                               | [15,16] |
| 910                       | RNA                                                                                                          | [15]    |
| 960                       | Proteins, tryptophan, valine                                                                                 | [14]    |
| 1094                      | Proteins: Str ( $C - H$ )                                                                                    | [15]    |
| 1278                      | Protein amide III                                                                                            | [14]    |
| 1328                      | Twist ( $CH_2$ ); DNA; RNA                                                                                   | [16]    |
| 1371                      | Lipids: Symmetry bend( $CH_3$ )                                                                              | [17]    |
| 1396                      | Proteins: Twist ( $CH_2$ ), ( $CH_3$ )                                                                       | [18]    |
| 1453                      | ( $CH_2$ ) bending mode in malignant tissues, bending modes of methyl groups (vibrational modes of collagen) | [16,19] |
| 1541                      | ( $NH$ ) and ( $NH_2$ ) in cytosine, cytidine                                                                | [19]    |
| 1586                      | Scissor ( $CN_2$ ) and rock ( $NH_2$ ) in mitochondria and phosphorylated proteins                           | [19,20] |

|                   |                                                                                            |      |
|-------------------|--------------------------------------------------------------------------------------------|------|
| 1695              | In plane bend ( $C = O$ ) in nucleic acids                                                 | [13] |
| <b>Cysteine</b>   |                                                                                            |      |
| 665               | Scissor ( $C_\gamma O_2^-$ ); Str ( $C_\beta - S$ )                                        | [21] |
| 810               | Bend ( $C_\gamma C_\alpha C_\beta$ ); Str ( $C_\alpha - S$ ); Str ( $C_\alpha - C_\beta$ ) | [21] |
| 830               | Wag ( $C_\beta H_2$ ); Str ( $C_\alpha - N$ )                                              | [21] |
| 908               | Str ( $C_\alpha - C_\gamma$ ); Rock ( $NH_3^+$ ); Scissor ( $C_\gamma O_2^-$ )             | [21] |
| 1001              | In plane bend (CCN); Bend (NCH)                                                            | [22] |
| 1054              | Twist ( $C_\beta H_2$ ); Str ( $C_\alpha - N$ )                                            | [21] |
| 1132              | Str ( $C_\alpha - C_\beta$ ); Rock ( $NH_3^+$ ); Str ( $C_\alpha - N$ )                    | [21] |
| 1234              | Wag ( $C_\beta H_2$ ); Bend ( $C_\alpha - H$ )                                             | [21] |
| 1286              | Bend ( $C_\alpha - H$ ); Wag ( $C_\beta H_2$ )                                             | [21] |
| 1349              | Symmetric Str ( $C_\gamma O_2^-$ ); Bend ( $C_\alpha - H$ )                                | [21] |
| 1415              | Symmetric Str ( $C_\gamma O_2^-$ )                                                         | [21] |
| 1519              | In plane bend ( $COO^-$ )                                                                  | [22] |
| 1596              | Asymmetric Str ( $C_\gamma O_2^-$ ); Bend ( $NH_3^+$ )                                     | [21] |
| <b>Methionine</b> |                                                                                            |      |
| 560               | Rock ( $CO_2^-$ )                                                                          | [23] |
| 682               | Str ( $C_4 - S$ )                                                                          | [24] |
| 753               | Rock ( $CO_2^-$ )                                                                          | [23] |
| 829               | Asymmetric Str ( $C - S - C$ )                                                             | [25] |
| 856               | Str ( $C_2 - C_3$ )                                                                        | [24] |
| 950               | Str ( $C_1 - C_2$ )                                                                        | [24] |
| 1002              | Rock ( $CH_2$ )                                                                            | [23] |
| 1049              | Str ( $C_2 - N$ )                                                                          | [24] |
| 1141              | Asymmetric Str ( $C_\alpha CN$ )                                                           | [25] |
| 1238              | In plane bend ( $CC_\alpha H$ )                                                            | [25] |
| 1283              | Twist ( $CH_2$ )                                                                           | [23] |
| 1318              | Str ( $C - NH_2$ )                                                                         | [25] |
| 1382              | Str ( $COO^-$ )                                                                            | [25] |
| 1444              | In plane bend asymmetry ( $CH_3$ ); In plane bend symmetry ( $CH_2$ )                      | [23] |

Abbreviations: AMG -attached to methyl group; Str- stretching

## References

1. Gupta, R.; Weimer, W.A. High enhancement factor gold films for surface enhanced Raman spectroscopy. *Chem. Phys. Lett.* **2003**, *374*, 302–306. [https://doi.org/10.1016/S0009-2614\(03\)00737-1](https://doi.org/10.1016/S0009-2614(03)00737-1).
2. Dutta Roy, S.; Ghosh, M.; Chowdhury, J. Adsorptive parameters and influence of hot geometries on the SER(R) S spectra of methylene blue molecules adsorbed on gold nanocolloidal particles. *J. Raman Spectrosc.* **2015**, *46*, 451–461. <https://doi.org/10.1002/jrs.4675>.

3. Ikramova, S.B.; Utegulov, Z.N.; Dikhanbayev, K.K.; Gaipov, A.E.; Nemkayeva, R.R.; Yakunin, V.G.; Savinov, V.P.; Timoshenko, V.Y. Surface-Enhanced Raman Scattering from Dye Molecules in Silicon Nanowire Structures Decorated by Gold Nanoparticles. *Int. J. Mol. Sci.* **2022**, *23*, 2590. <https://doi.org/10.3390/ijms23052590>.
4. Ruan, C.; Wang, W.; Gu, B. Single-molecule detection of thionine on aggregated gold nanoparticles by surface enhanced Raman scattering. *J. Raman Spectrosc.* **2007**, *38*, 568–573. <https://doi.org/10.1002/jrs.1691>.
5. Harpster, M.H.; Zhang, H.; Sankara-Warrier, A.K.; Ray, B.H.; Ward, T.R.; Kollmar, J.P.; Carron, K.T.; Mecham, J.O.; Corcoran, R.C.; Wilson, W.C.; et al. SERS detection of indirect viral DNA capture using colloidal gold and methylene blue as a Raman label. *Biosens. Bioelectron.* **2009**, *25*, 674–681. <https://doi.org/10.1016/j.bios.2009.05.020>.
6. Eliasson, C.; Lorén, A.; Murty, K.V.G.K.; Josefson, M.; Käll, M.; Abrahamsson, J.; Abrahamsson, K. Multivariate evaluation of doxorubicin surface-enhanced Raman spectra. *Spectrochim. Acta - Part A Mol. Biomol. Spectrosc.* **2001**, *57*, 1907–1915. [https://doi.org/10.1016/S1386-1425\(01\)00453-X](https://doi.org/10.1016/S1386-1425(01)00453-X).
7. Chul, J.L.; Jae, S.K.; Mak, S.K.; Kwang, P.L.; Mu, S.L. The study of doxorubicin and its complex with DNA by SERS and UV-resonance Raman spectroscopy. *Bull. Korean Chem. Soc.* **2004**, *25*, 1211–1216. <https://doi.org/10.5012/bkcs.2004.25.8.1211>.
8. Gautier, J.; Munnier, E.; Douziech-Eyrolles, L.; Paillard, A.; Dubois, P.; Chourpa, I. SERS spectroscopic approach to study doxorubicin complexes with Fe<sup>2+</sup> ions and drug release from SPION-based nanocarriers. *Analyst* **2013**, *138*, 7354. <https://doi.org/10.1039/c3an00787a>.
9. Beljebbar, A.; Sockalingum, G.D.; Angiboust, J.F.; Manfait, M. Comparative FT SERS, resonance Raman and SERRS studies of doxorubicin and its complex with DNA. *Spectrochim. Acta Part A Mol. Spectrosc.* **1995**, *51*, 2083–2090. [https://doi.org/10.1016/0584-8539\(95\)01515-7](https://doi.org/10.1016/0584-8539(95)01515-7).
10. Minati, L.; Maniglio, D.; Benetti, F.; Chiappini, A.; Speranza, G. Multimodal Gold Nanostars as SERS Tags for Optically-Driven Doxorubicin Release Study in Cancer Cells. *Materials (Basel)*. **2021**, *14*, 7272. <https://doi.org/10.3390/ma14237272>.
11. Farcas, A.; Iacovita, C.; Vinteler, E.; Chis, V.; Stiufiuc, R.; Lucaciu, M. The Influence of Molecular Structure Modifications on Vibrational Properties of Some Beta Blockers: A Combined Raman and DFT Study. *J Spectrosc* **2016**, *2016*, 1–9. <https://doi.org/10.1155/2016/3137140>.
12. Cozar, I.B.; Szabó, L.; Leopold, N.; Chiş, V.; David, L. Raman, sers and dft study of atenolol and metoprolol cardiovascular drugs. *Rom. Reports Phys.* **2010**, *55*, 772–781.
13. Guerrini, L.; Garcia-Rico, E.; O’Loghlen, A.; Giannini, V.; Alvarez-Puebla, R.A. Surface-Enhanced Raman Scattering (SERS) Spectroscopy for Sensing and Characterization of Exosomes in Cancer Diagnosis. *Cancers (Basel)*. **2021**, *13*, 2179. <https://doi.org/10.3390/cancers13092179>.
14. Bruzas, I.; Lum, W.; Gorunmez, Z.; Sagle, L. Advances in surface-enhanced Raman spectroscopy (SERS) substrates for lipid and protein characterization: sensing and beyond. *Analyst* **2018**, *143*, 3990–4008. <https://doi.org/10.1039/C8AN00606G>.
15. Liu, M.; Liu, X.; Huang, Z.; Tang, X.; Lin, X.; Xu, Y.; Chen, G.; Kwok, H.F.; Lin, Y.; Feng, S. Rapid discrimination of colon cancer cells with single base mutation in KRAS gene segment using laser tweezers Raman spectroscopy. *J. Biophotonics* **2019**, *12*. <https://doi.org/10.1002/jbio.201800332>.
16. Cao, Z.; Pan, X.; Yu, H.; Hua, S.; Wang, D.; Chen, D.Z.; Zhou, M.; Wu, J. A Deep Learning Approach for Detecting Colorectal Cancer via Raman Spectra. *BME Front.* **2022**, *2022*, 1–10. <https://doi.org/10.34133/2022/9872028>.

17. Liu, W.; Sun, Z.; Chen, J.; Jing, C. Raman Spectroscopy in Colorectal Cancer Diagnostics: Comparison of PCA-LDA and PLS-DA Models. *J. Spectrosc.* **2016**, *2016*, 1–6. <https://doi.org/10.1155/2016/1603609>.
18. Kneipp, J.; Kneipp, H.; Wittig, B.; Kneipp, K. Novel optical nanosensors for probing and imaging live cells. *Nanomedicine Nanotechnology, Biol. Med.* **2010**, *6*, 214–226. <https://doi.org/10.1016/j.nano.2009.07.009>.
19. Brozek-Pluska; Musial; Kordek; Abramczyk Analysis of Human Colon by Raman Spectroscopy and Imaging-Elucidation of Biochemical Changes in Carcinogenesis. *Int. J. Mol. Sci.* **2019**, *20*, 3398. <https://doi.org/10.3390/ijms20143398>.
20. Beton, K.; Wysocki, P.; Brozek-Pluska, B. Mevastatin in colon cancer by spectroscopic and microscopic methods – Raman imaging and AFM studies. *Spectrochim. Acta Part A Mol. Biomol. Spectrosc.* **2022**, *270*, 120726. <https://doi.org/10.1016/j.saa.2021.120726>.
21. Yao, G.; Huang, Q. DFT and SERS Study of <scp>I</scp>-Cysteine Adsorption on the Surface of Gold Nanoparticles. *J. Phys. Chem. C* **2018**, *122*, 15241–15251. <https://doi.org/10.1021/acs.jpcc.8b00949>.
22. Chang, C.; Chen, Y.; Huang, Y.; Lai, C.-H.; Jeng, U.-S.; Lai, Y.-H. Nanostructured silver dendrites for photon-induced Cysteine dimerization. *Sci. Rep.* **2019**, *9*, 20174. <https://doi.org/10.1038/s41598-019-56517-5>.
23. Melo, W.D.C.; Freire, P.T.C.; Filho, J.M.; Melo, F.E.A.; Lima, J.A.; Paraguassu, W. Raman spectroscopy of d-methionine under high pressure. *Vib. Spectrosc.* **2014**, *72*, 57–61. <https://doi.org/10.1016/j.vibspec.2014.02.012>.
24. Graff, M.; Bukowska, J. Surface-enhanced Raman scattering (SERS) spectroscopy of enantiomeric and racemic methionine on a silver electrode-evidence for chiral discrimination in interactions between adsorbed molecules. *Chem. Phys. Lett.* **2011**, *509*, 58–61. <https://doi.org/10.1016/j.cplett.2011.04.089>.
25. Podstawka, E.; Ozaki, Y.; Proniewicz, L.M. Part II: Surface-Enhanced Raman Spectroscopy Investigation of Methionine Containing Heterodipeptides Adsorbed on Colloidal Silver. *Appl. Spectrosc.* **2004**, *58*, 581–590. <https://doi.org/10.1366/000370204774103417>.
